# Supplementary material for: Maternal Health Care Service Utilization in the Post-Conflict Democratic Republic of Congo: An Analysis of Health Inequalities over Time
Source: MDPI journal article supplement (doi:10.3390/healthcare11212871), 2023-10-31

Additional file **S3 Lorenz Curves** for all selected maternal health care services utilization variables

### Ever birth by C-section

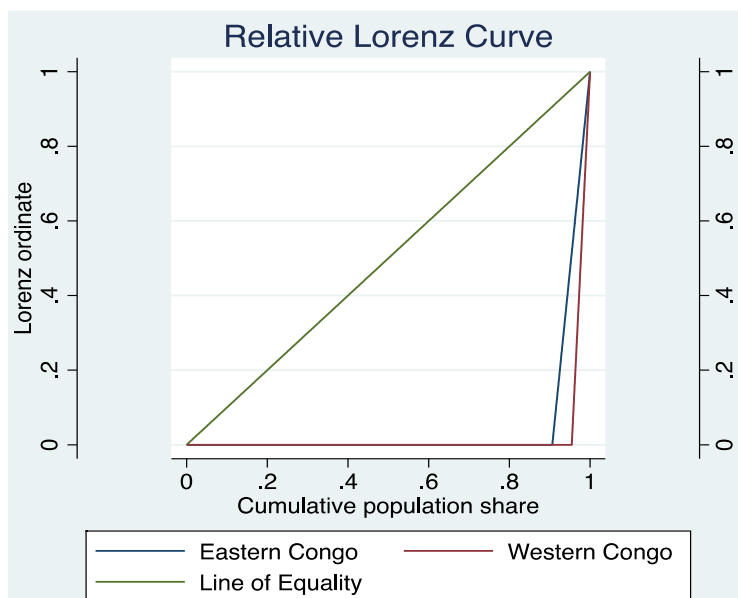

### Last birth C-section

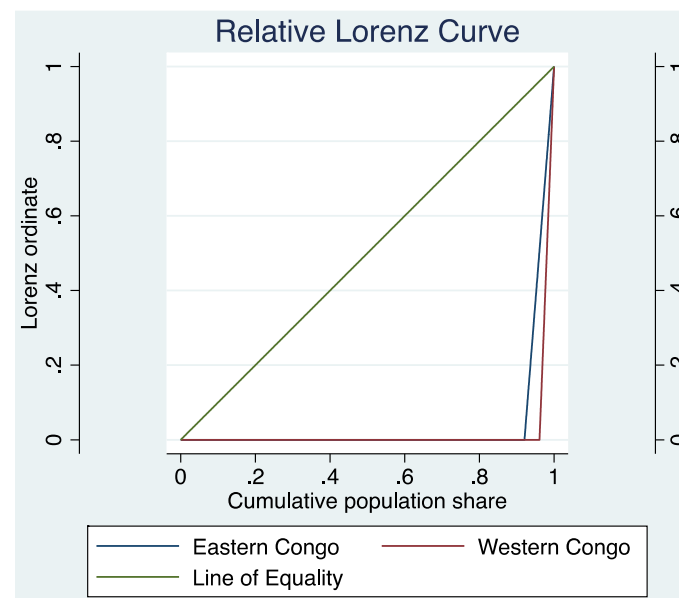

## Prenatal Check Number

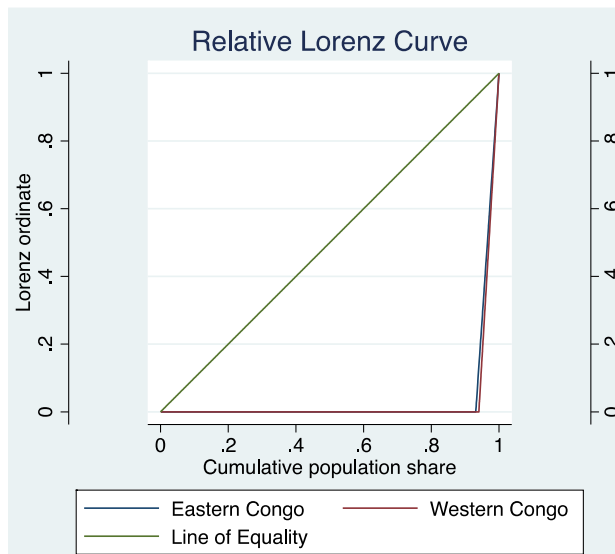

## Prenatal check weighed

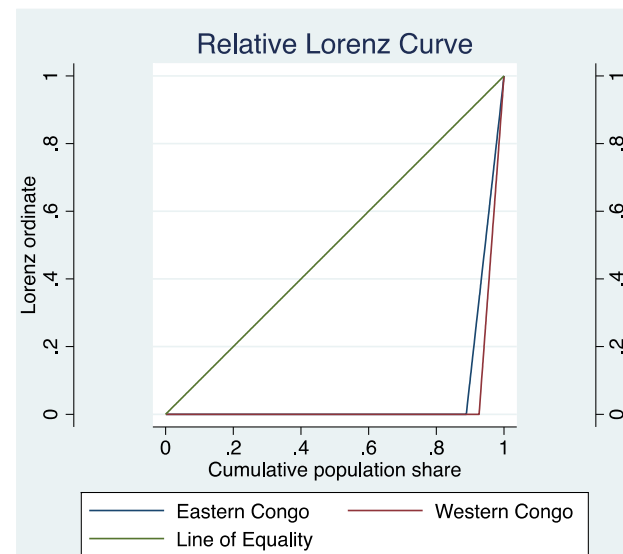

## Prenatal check height

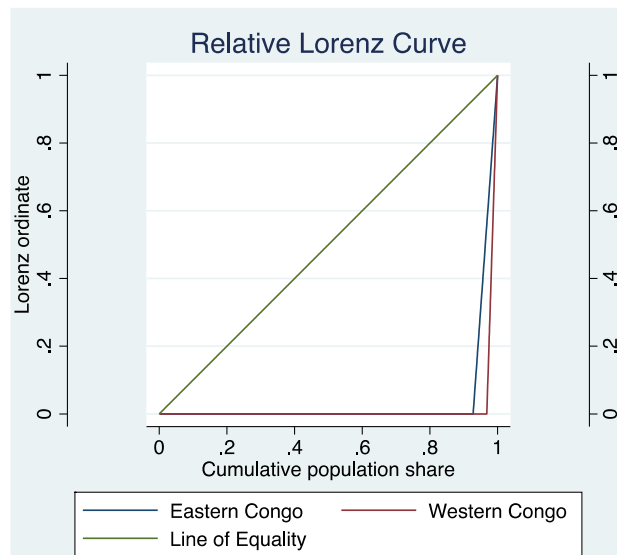

## Prenatal check of blood pressure

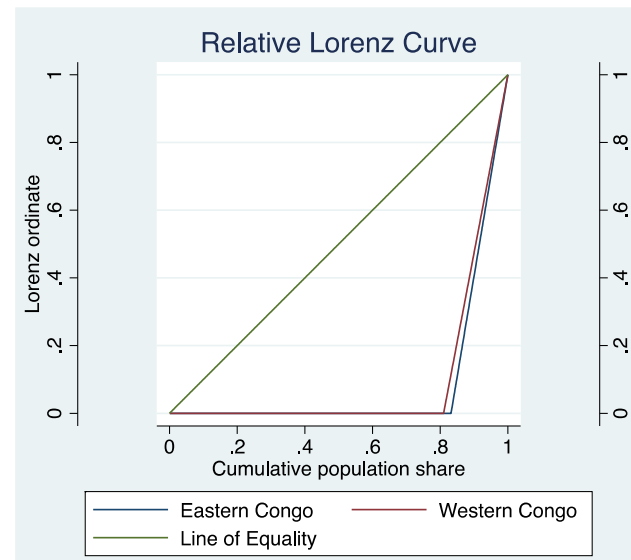

## Prenatal check urine sample

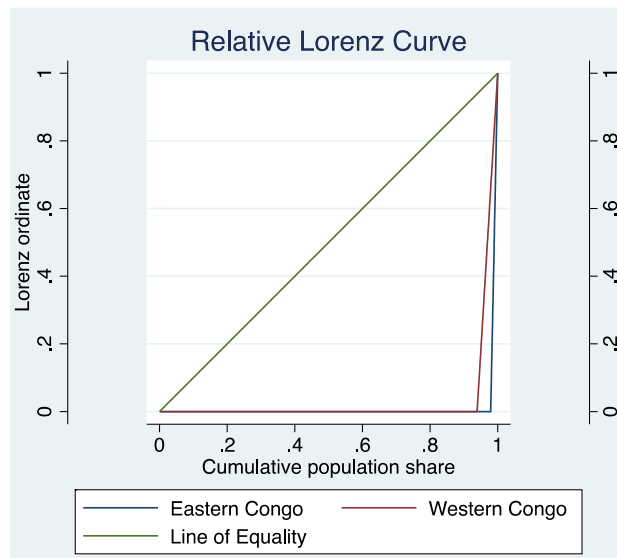

## Prenatal check blood sample

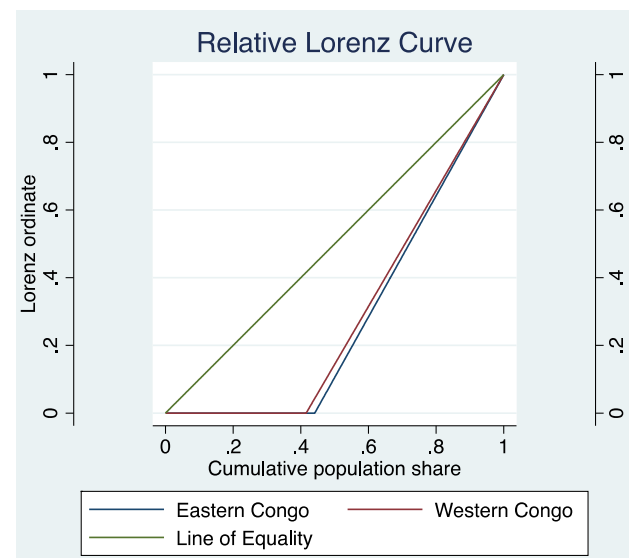

## Tetanus injections

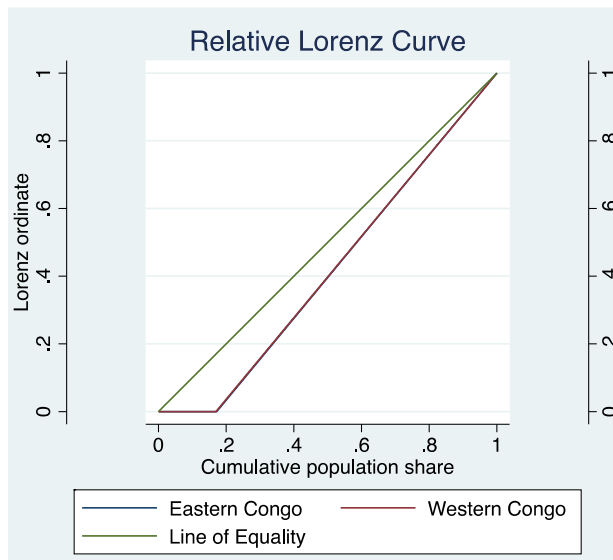

## Received pregnancy information

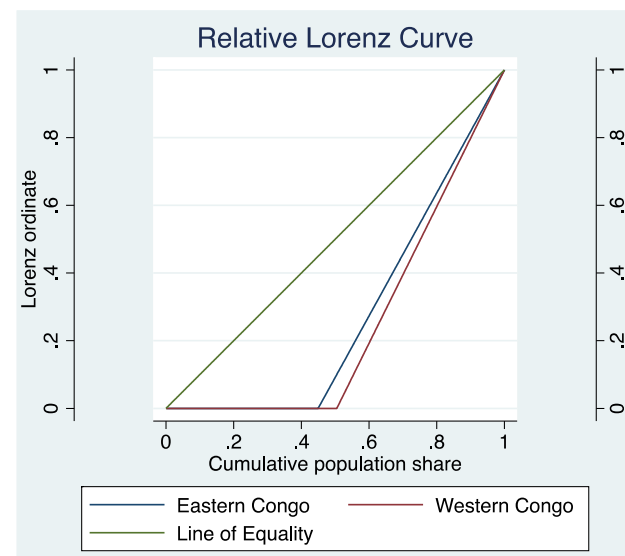

## Received postnatal checkup

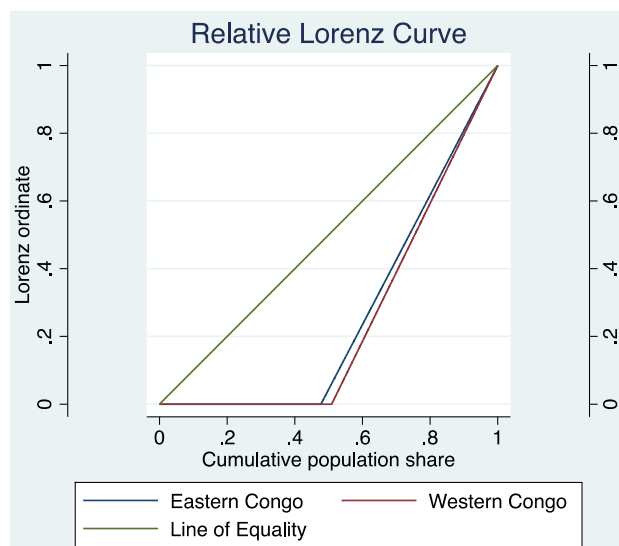

## Visited health facilities last 12 months

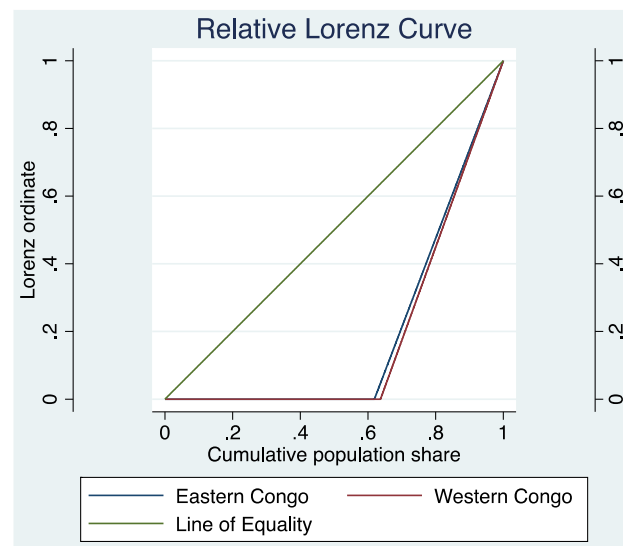

## Number of antenatal visits

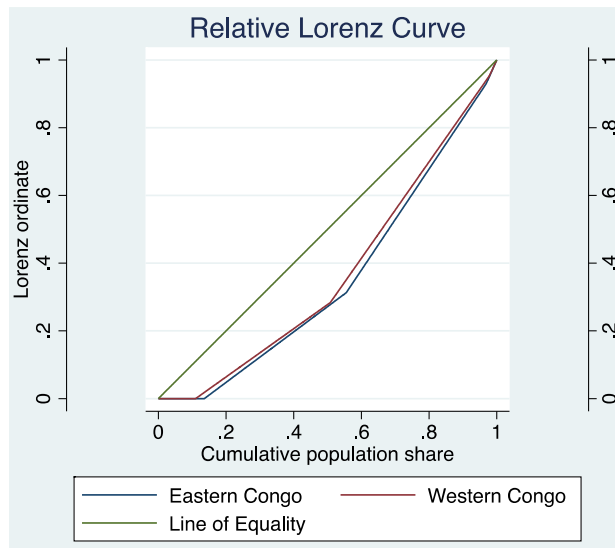

## Prenatal care received

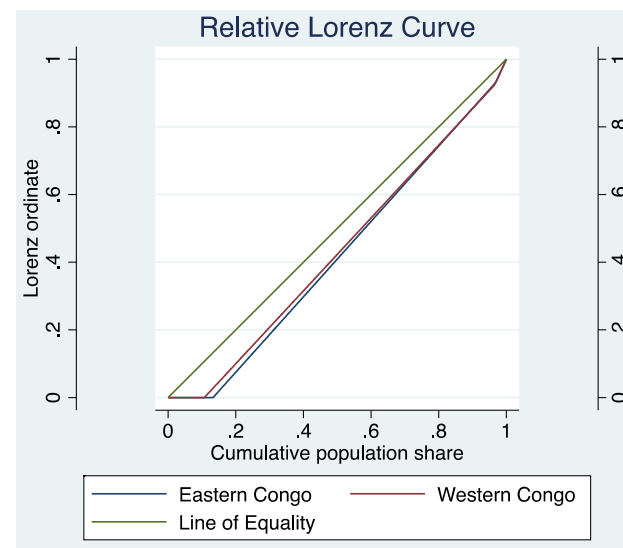

## Assistance during delivery

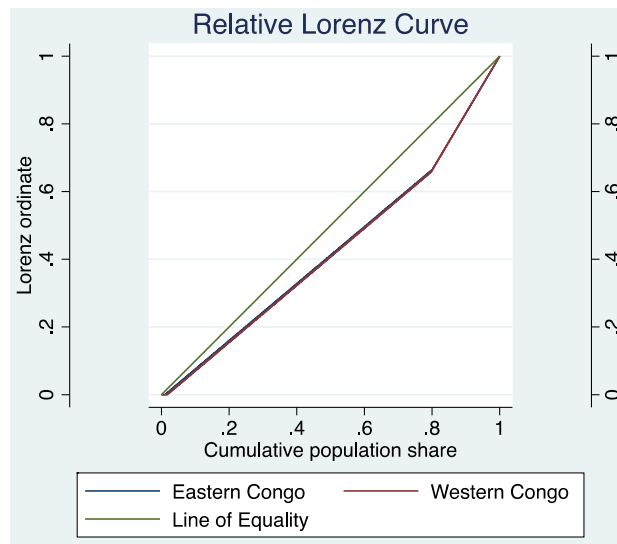

Supplement: s1 [file s1]
