# Supplementary material for: Maternal Health Care Service Utilization in the Post-Conflict Democratic Republic of Congo: An Analysis of Health Inequalities over Time
Source: MDPI journal article supplement (doi:10.3390/healthcare11212871), 2023-10-31
Supplement: s1 [file s1]

| <b>Table S4. Gini coefficients for all selected maternal health variables</b> |                    |             |                |                    |             |                |
|-------------------------------------------------------------------------------|--------------------|-------------|----------------|--------------------|-------------|----------------|
|                                                                               | <b>Eastern DRC</b> |             |                | <b>Western DRC</b> |             |                |
| <b>All selected Variables</b>                                                 | <b>Overall</b>     | <b>2007</b> | <b>2013/14</b> | <b>Overall</b>     | <b>2007</b> | <b>2013/14</b> |
| <b>Cesarean-section</b>                                                       |                    |             |                |                    |             |                |
| Ever birth C-section                                                          | 0.91               | 0.94        | 0.90           | 0.96               | 0.96        | 0.96           |
| Last birth C-section                                                          | 0.93               | 0.95        | 0.92           | 0.97               | 0.96        | 0.97           |
| <b>Prenatal care</b>                                                          |                    |             |                |                    |             |                |
| Prenatal check_no                                                             | 0.94               | 0.93        | 0.94           | 0.95               | 0.95        | 0.95           |
| Received prenatal care                                                        | 0.17               | 0.24        | 0.13           | 0.15               | 0.14        | 0.15           |
| Prenatal check weighed                                                        | 0.89               | 0.88        | 0.88           | 0.93               | 0.92        | 0.94           |
| Prenatal check height                                                         | 0.93               | 0.97        | 0.91           | 0.97               | 0.97        | 0.98           |
| Prenatal check blood pressure                                                 | 0.84               | 0.83        | 0.84           | 0.82               | 0.82        | 0.81           |
| Prenatal check urine sample                                                   | 0.98               | 0.97        | 0.99           | 0.94               | 0.95        | 0.94           |
| Prenatal check blood sample                                                   | 0.45               | 0.45        | 0.45           | 0.42               | 0.42        | 0.42           |
| Tetanus injections                                                            | 0.18               | 0.24        | 0.15           | 0.17               | 0.19        | 0.17           |
| Received pregnancy information                                                | 0.45               | 0.61        | 0.39           | 0.51               | 0.67        | 0.43           |
| <b>Postnatal Care</b>                                                         |                    |             |                |                    |             |                |
| Received postnatal checkup                                                    | 0.48               | 0.04        | 0.49           | 0.51               | 0.13        | 0.52           |
| Visited health facilities last 12 months                                      | 0.62               | 0.66        | 0.61           | 0.64               | 0.67        | 0.62           |
| Assistance during delivery                                                    | 0.15               | 0.17        | 0.14           | 0.16               | 0.17        | 0.15           |
