# Supplementary material for: Maternal Health Care Service Utilization in the Post-Conflict Democratic Republic of Congo: An Analysis of Health Inequalities over Time
Source: MDPI journal article supplement (doi:10.3390/healthcare11212871), 2023-10-31
Supplement: s1 [file s1]

| Table S2. Odds ratio of all selected maternal health variables by socio-demogra                                                                                     |                               |                               |                                   |                      |                                |                                |                               |                                   |                              |                             |                             |                               |                       |                             |
|---------------------------------------------------------------------------------------------------------------------------------------------------------------------|-------------------------------|-------------------------------|-----------------------------------|----------------------|--------------------------------|--------------------------------|-------------------------------|-----------------------------------|------------------------------|-----------------------------|-----------------------------|-------------------------------|-----------------------|-----------------------------|
|                                                                                                                                                                     | Delivery                      |                               |                                   | Antenatal care       |                                |                                |                               |                                   |                              |                             |                             | Postnatal Care                |                       |                             |
| Variables                                                                                                                                                           | Everbirth<br>odds ratio       | Csection<br>odds ratio        | Lastbirth<br>odds ratio           | Number<br>odds ratio | Weighed<br>odds ratio          | Height<br>odds ratio           | Blood pressure<br>odds ratio  | Urine sample<br>odds ratio        | Blood sample<br>odds ratio   | Tetainjectbp2<br>odds ratio | Receivedinfo<br>odds ratio  | Receivedpostnat<br>odds ratio | checkup<br>odds ratio | Visitedhealth<br>odds ratio |
| Base = Eastern Congo                                                                                                                                                |                               |                               |                                   |                      |                                |                                |                               |                                   |                              |                             |                             |                               |                       |                             |
| Western Congo                                                                                                                                                       | 1.025<br>(0.707 - 1.487)      | 1.236<br>(0.886 - 1.725)      | 1.444<br>(0.715 - 2.916)          |                      | 1.277<br>(0.647 - 2.521)       | 0.298***<br>(0.147 - 0.607)    | 1476<br>(0.780 - 2.794)       | 3.745***<br>(1.593 - 8.805)       | 0.623**<br>(0.400 - 0.971)   | 0.841<br>(0.509 - 1.387)    | 0.751<br>(0.501 - 1.126)    | 0.997<br>(0.837 - 1.187)      |                       | 1.009<br>(0.905 - 1.126)    |
| Base = 2013-2014                                                                                                                                                    |                               |                               |                                   |                      |                                |                                |                               |                                   |                              |                             |                             |                               |                       |                             |
| 2007                                                                                                                                                                | 0.793**<br>(0.655 - 0.959)    | 0.823<br>(0.676 - 1.001)      | 0.921<br>(0.527 - 1.609)          |                      | 1.252<br>(0.787 - 1.992)       | 0.794<br>(0.393 - 1.604)       | 1.061<br>(0.737 - 1.527)      | 1.006<br>(0.566 - 1.785)          | 0.949<br>(0.713 - 1.262)     | 0.758<br>(0.539 - 1.066)    | 0.373***<br>(0.282 - 0.493) | 13.06***<br>(7.255 - 23.51)   |                       | 0.836***<br>(0.777 - 0.899) |
| Base = Catholic                                                                                                                                                     |                               |                               |                                   |                      |                                |                                |                               |                                   |                              |                             |                             |                               |                       |                             |
| Protestant                                                                                                                                                          | 0.920<br>(0.720 - 1.176)      | 0.819<br>(0.632 - 1.060)      | 1005<br>(0.517 - 1.952)           |                      | 0.792<br>(0.461 - 1.359)       | 1163<br>(0.594 - 2.280)        | 0.873<br>(0.561 - 1.359)      | 0.705<br>(0.361 - 1.375)          | 1270<br>(0.900 - 1.793)      | 1035<br>(0.695 - 1.541)     | 1201<br>(0.855 - 1.686)     | 1032<br>(0.890 - 1.197)       |                       | 1046<br>(0.953 - 1.148)     |
| Kimbanguist                                                                                                                                                         | 0.404***<br>(0.221 - 0.740)   | 0.357***<br>(0.184 - 0.693)   | 1745<br>(0.511 - 5.959)           |                      | 0.204**<br>(0.0466 - 0.895)    | 0.145<br>(0.0181 - 1.162)      | 0.877<br>(0.381 - 2.018)      | 0.527<br>(0.0634 - 4.376)         | 1634<br>(0.717 - 3.725)      | 0.820<br>(0.353 - 1.905)    | 0.952<br>(0.485 - 1.871)    | 0.484***<br>(0.338 - 0.693)   |                       | 0.811<br>(0.653 - 1.008)    |
| Other Christians                                                                                                                                                    | 0.781**<br>(0.619 - 0.984)    | 0.743**<br>(0.578 - 0.955)    | 1269<br>(0.604 - 2.666)           |                      | 0.896<br>(0.507 - 1.584)       | 1663<br>(0.831 - 3.327)        | 0.806<br>(0.519 - 1.252)      | 0.572<br>(0.295 - 1.107)          | 1173<br>(0.826 - 1.666)      | 1221<br>(0.802 - 1.860)     | 0.829<br>(0.591 - 1.164)    | 0.783***<br>(0.676 - 0.906)   |                       | 1033<br>(0.945 - 1.130)     |
| Muslim                                                                                                                                                              | 0.544<br>(0.287 - 1.033)      | 0.543<br>(0.274 - 1.074)      | 2.753<br>(0.882 - 8.601)          |                      | 0.187<br>(0.550 - 4.482)       | 1570<br>(0.0194 - 1.802)       | 0.254<br>(0.0350 - 1.837)     | 1163<br>(0.138 - 9.828)           | 1264<br>(0.467 - 3.426)      | 3033<br>(0.698 - 13.18)     | 0.600<br>(0.159 - 2.259)    | 0.840<br>(0.527 - 1.340)      |                       | 0.907<br>(0.692 - 1.190)    |
| Animist                                                                                                                                                             | 0.529<br>(0.0861 - 3.254)     | 0.574<br>(0.0938 - 3.512)     | 4291<br>(0.646 - 28.50)           |                      | 0.574<br>(0.0481 - 1.339)      | 1015<br>(0.109 - 2.949)        | 1015<br>(0.190 - 5.428)       | 1419<br>(0.396 - 5.081)           | 1603<br>(0.435 - 5.904)      | 2043<br>(0.533 - 7.832)     | 2043<br>(0.438 - 1.956)     | 0.926<br>(0.438 - 1.956)      |                       | 1421<br>(0.888 - 2.272)     |
| No religion                                                                                                                                                         | 0.517<br>(0.167 - 1.601)      | 0.462<br>(0.118 - 1.810)      |                                   |                      | 0.254<br>(0.0481 - 1.339)      |                                | 0.567<br>(0.109 - 2.949)      | 2172<br>(0.479 - 9.852)           | 3.945**<br>(1.146 - 13.58)   | 1554<br>(0.380 - 6.350)     | 1215<br>(0.418 - 3.530)     | 0.802<br>(0.485 - 1.326)      |                       | 1024<br>(0.692 - 1.513)     |
| Other                                                                                                                                                               | 1137<br>(0.472 - 2.741)       | 1124<br>(0.436 - 2.900)       | 1571<br>(0.291 - 8.483)           |                      | 3.293<br>(0.824 - 13.16)       | 2679<br>(0.719 - 9.983)        | 0.889<br>(0.183 - 4.324)      |                                   | 0.341<br>(0.0820 - 1.416)    | 0.661<br>(0.185 - 2.356)    | 1154<br>(0.401 - 3.319)     | 0.551***<br>(0.357 - 0.852)   |                       | 0.960<br>(0.697 - 1.321)    |
| Base = Bakongo north and South                                                                                                                                      |                               |                               |                                   |                      |                                |                                |                               |                                   |                              |                             |                             |                               |                       |                             |
| Bas-Kasai and Kwilu-Kwngo                                                                                                                                           | 0.595***<br>(0.410 - 0.863)   | 0.493***<br>(0.341 - 0.713)   | 8.754<br>(0.879 - 87.13)          |                      | 7.987***<br>(1.879 - 33.95)    | 7.777**<br>(1.315 - 45.98)     | 0.641<br>(0.307 - 1.340)      | 3430<br>(0.766 - 15.37)           | 0.475**<br>(0.259 - 0.870)   | 0.425**<br>(0.187 - 0.966)  | 0.650<br>(0.380 - 1.111)    | 1.267**<br>(1.001 - 1.604)    |                       | 0.985<br>(0.866 - 1.122)    |
| Cuvette Central                                                                                                                                                     | 0.560**<br>(0.335 - 0.936)    | 0.463***<br>(0.265 - 0.809)   | 13.85**<br>(1.559 - 123.1)        |                      | 5.978**<br>(1.146 - 31.19)     | 1653<br>(0.244 - 11.22)        | 1284<br>(0.565 - 2.920)       | 2920<br>(0.560 - 15.22)           | 0.380***<br>(0.188 - 0.767)  | 0.593<br>(0.250 - 1.407)    | 0.951<br>(0.477 - 1.893)    | 0.582***<br>(0.440 - 0.771)   |                       | 1.321***<br>(1.128 - 1.548) |
| Ubangi and Itimbiri                                                                                                                                                 | 0.535***<br>(0.362 - 0.791)   | 0.435***<br>(0.285 - 0.665)   | 6162<br>(0.680 - 55.83)           |                      | 1044<br>(0.222 - 4.909)        | 2512<br>(0.417 - 15.14)        | 0.981<br>(0.465 - 2.068)      | 11.64***<br>(2.791 - 48.53)       | 0.537<br>(0.285 - 1.014)     | 0.840<br>(0.355 - 1.991)    | 0.631<br>(0.351 - 1.135)    | 0.435***<br>(0.338 - 0.560)   |                       | 1.335***<br>(1.158 - 1.541) |
| Uele Lake Albert                                                                                                                                                    | 1360<br>(0.806 - 2.294)       | 1434<br>(0.855 - 2.404)       | 34.34***<br>(3.445 - 342.3)       |                      | 21.52***<br>(4.270 - 108.5)    | 1027<br>(0.127 - 8.335)        | 1389<br>(0.481 - 4.013)       | 0.401<br>(0.0333 - 4.820)         | 0.167***<br>(0.0752 - 0.369) | 0.487<br>(0.174 - 1.367)    | 0.395**<br>(0.187 - 0.834)  | 0.806<br>(0.590 - 1.101)      |                       | 1022<br>(0.842 - 1.240)     |
| Basele-k, man. And Kivu                                                                                                                                             | 2.111***<br>(1.322 - 3.371)   | 2.372***<br>(1.548 - 3.636)   | 16.19**<br>(1.623 - 161.6)        |                      | 9.505***<br>(1.968 - 45.90)    | 4289<br>(0.694 - 26.51)        | 1286<br>(0.479 - 3.455)       | 7.827**<br>(1.463 - 41.88)        | 0.215***<br>(0.103 - 0.449)  | 0.490<br>(0.193 - 1.246)    | 0.675<br>(0.342 - 1.329)    | 1143<br>(0.854 - 1.531)       |                       | 1.433***<br>(1.215 - 1.690) |
| Kasai, Katanga, Tanganika                                                                                                                                           | 0.630***<br>(0.447 - 0.888)   | 0.611***<br>(0.432 - 0.863)   | 23.73***<br>(2.773 - 203.0)       |                      | 7.352***<br>(1.781 - 30.36)    | 3202<br>(0.557 - 18.42)        | 1463<br>(0.739 - 2.895)       | 6.586***<br>(1.577 - 27.51)       | 0.219***<br>(0.123 - 0.393)  | 0.504<br>(0.229 - 1.107)    | 0.515**<br>(0.308 - 0.859)  | 0.675***<br>(0.536 - 0.849)   |                       | 1.235***<br>(1.096 - 1.393) |
| Lunda                                                                                                                                                               | 1486<br>(0.649 - 3.400)       | 1618<br>(0.693 - 3.777)       | 4774<br>(0.239 - 95.49)           |                      | 0.600<br>(0.755 - 33.42)       | 0.600<br>(0.0410 - 8.780)      | 0.375<br>(0.0744 - 1.893)     | 1265<br>(0.389 - 4.121)           | 0.768<br>(0.148 - 3.983)     | 0.462<br>(0.120 - 1.774)    |                             | 1102<br>(0.608 - 1.998)       |                       | 1.712***<br>(1.205 - 2.432) |
| Other                                                                                                                                                               | 0.458<br>(0.166 - 1.266)      | 0.523<br>(0.189 - 1.444)      | 39.47***<br>(2.957 - 526.8)       |                      | 1703<br>(0.124 - 23.40)        | 5772<br>(0.375 - 88.82)        |                               | 41.64***<br>(4.806 - 360.8)       | 0.214<br>(0.0407 - 1.124)    | 1728<br>(0.178 - 16.74)     | 0.491<br>(0.133 - 1.816)    | 0.705<br>(0.371 - 1.342)      |                       | 1083<br>(0.737 - 1.592)     |
| Base = Urban                                                                                                                                                        |                               |                               |                                   |                      |                                |                                |                               |                                   |                              |                             |                             |                               |                       |                             |
| Rural                                                                                                                                                               | 0.788<br>(0.610 - 1.018)      | 0.755**<br>(0.579 - 0.985)    | 1232<br>(0.569 - 2.668)           |                      | 1088<br>(0.551 - 2.147)        | 1478<br>(0.706 - 3.091)        | 1.897***<br>(1.173 - 3.068)   | 0.717<br>(0.337 - 1.524)          | 0.631**<br>(0.440 - 0.904)   | 0.541**<br>(0.333 - 0.880)  | 0.721<br>(0.500 - 1.038)    | 0.641***<br>(0.547 - 0.751)   |                       | 0.884**<br>(0.794 - 0.984)  |
| Base = Poorest                                                                                                                                                      |                               |                               |                                   |                      |                                |                                |                               |                                   |                              |                             |                             |                               |                       |                             |
| Poorer                                                                                                                                                              | 1013<br>(0.729 - 1.407)       | 1156<br>(0.813 - 1.644)       | 0.678<br>(0.375 - 1.224)          |                      | 0.885<br>(0.517 - 1.514)       | 0.752<br>(0.351 - 1.609)       | 0.910<br>(0.575 - 1.438)      | 0.938<br>(0.433 - 2.032)          | 1.407<br>(0.959 - 2.064)     | 1.547**<br>(1.007 - 2.377)  | 1078<br>(0.751 - 1.549)     | 1112<br>(0.947 - 1.306)       |                       | 1.130**<br>(1.011 - 1.264)  |
| Middle                                                                                                                                                              | 1170<br>(0.838 - 1.634)       | 1301<br>(0.913 - 1.854)       | 0.823<br>(0.464 - 1.459)          |                      | 0.988<br>(0.554 - 1.762)       | 0.420**<br>(0.194 - 0.911)     | 0.885<br>(0.555 - 1.413)      | 1144<br>(0.558 - 2.346)           | 1.407<br>(0.972 - 2.037)     | 1.691**<br>(1.086 - 2.632)  | 1220<br>(0.846 - 1.759)     | 1.236**<br>(1.049 - 1.457)    |                       | 1090<br>(0.973 - 1.221)     |
| Richer                                                                                                                                                              | 1.755***<br>(1.244 - 2.477)   | 1.726***<br>(1.217 - 2.447)   | 0.298**<br>(0.112 - 0.790)        |                      | 0.468<br>(0.216 - 1.011)       | 0.965<br>(0.432 - 2.156)       | 0.599<br>(0.350 - 1.026)      | 0.601<br>(0.224 - 1.615)          | 2.710***<br>(1.753 - 4.189)  | 1325<br>(0.794 - 2.213)     | 1372<br>(0.887 - 2.122)     | 1.401***<br>(1.156 - 1.697)   |                       | 1.125<br>(0.988 - 1.281)    |
| Richest                                                                                                                                                             | 1.711***<br>(1.173 - 2.497)   | 1.757***<br>(1.183 - 2.610)   | 0.105**<br>(0.0179 - 0.623)       |                      | 0.143**<br>(0.0247 - 0.825)    | 0.436<br>(0.107 - 1.772)       | 0.394**<br>(0.166 - 0.935)    | 0.709<br>(0.213 - 2.361)          | 4.180***<br>(2.254 - 7.749)  | 1294<br>(0.613 - 2.731)     | 1218<br>(0.709 - 2.091)     | 1.824***<br>(1.444 - 2.304)   |                       | 1126<br>(0.971 - 1.306)     |
| Base = no - currently not working                                                                                                                                   |                               |                               |                                   |                      |                                |                                |                               |                                   |                              |                             |                             |                               |                       |                             |
| Yes - currently working                                                                                                                                             | 0.956<br>(0.769 - 1.189)      | 1027<br>(0.826 - 1.277)       | 1192<br>(0.672 - 2.114)           |                      | 1626<br>(0.909 - 2.908)        | 0.612<br>(0.341 - 1.101)       | 0.831<br>(0.564 - 1.225)      | 0.931<br>(0.498 - 1.741)          | 1045<br>(0.761 - 1.436)      | 0.789<br>(0.538 - 1.158)    | 1007<br>(0.756 - 1.341)     | 0.894<br>(0.786 - 1.017)      |                       | 1.502***<br>(1.393 - 1.621) |
| Base = no education                                                                                                                                                 |                               |                               |                                   |                      |                                |                                |                               |                                   |                              |                             |                             |                               |                       |                             |
| Primary education level                                                                                                                                             | 0.827<br>(0.624 - 1.098)      | 0.799<br>(0.597 - 1.069)      | 1070<br>(0.615 - 1.862)           |                      | 0.861<br>(0.511 - 1.450)       | 1225<br>(0.648 - 2.316)        | 0.854<br>(0.562 - 1.297)      | 1185<br>(0.558 - 2.518)           | 1128<br>(0.806 - 1.578)      | 1184<br>(0.802 - 1.747)     | 0.827<br>(0.591 - 1.157)    | 1.170**<br>(1.006 - 1.359)    |                       | 1.202***<br>(1.084 - 1.332) |
| Secondary education level                                                                                                                                           | 1083<br>(0.788 - 1.487)       | 1043<br>(0.760 - 1.431)       | 0.410**<br>(0.195 - 0.862)        |                      | 0.327***<br>(0.161 - 0.665)    | 0.711<br>(0.293 - 1.726)       | 0.833<br>(0.500 - 1.387)      | 0.834<br>(0.357 - 1.944)          | 2.231***<br>(1.492 - 3.336)  | 1.702**<br>(1.041 - 2.783)  | 1322<br>(0.885 - 1.974)     | 1.574***<br>(1.326 - 1.869)   |                       | 1.309***<br>(1.167 - 1.468) |
| Higher education level                                                                                                                                              | 1.669<br>(0.937 - 2.973)      | 1.860**<br>(1.033 - 3.352)    |                                   |                      |                                |                                | 0.0750**<br>(0.00841 - 0.669) |                                   | 59.56***<br>(6.627 - 535.2)  | 4726<br>(0.514 - 43.43)     | 23.93***<br>(3.161 - 181.2) | 3.805***<br>(2.247 - 6.443)   |                       | 1.584***<br>(1.284 - 1.955) |
| Constant                                                                                                                                                            | 0.0823***<br>(0.0450 - 0.150) | 0.0633***<br>(0.0350 - 0.114) | 0.00429***<br>(0.000318 - 0.0580) |                      | 0.0150***<br>(0.00210 - 0.107) | 0.0353***<br>(0.00401 - 0.311) | 0.181***<br>(0.0559 - 0.585)  | 0.00660***<br>(0.000916 - 0.0475) | 2.838**<br>(1.120 - 7.189)   | 10.85***<br>(3.345 - 35.17) | 2.956**<br>(1.219 - 7.168)  | 1.216<br>(0.834 - 1.773)      |                       | 0.310***<br>(0.247 - 0.389) |
| Observations                                                                                                                                                        | 16.609                        | 16.592                        | 2.163                             |                      | 2.164                          | 2.146                          | 2.184                         | 2.11                              | 2.198                        | 2.169                       | 2.173                       | 11.37                         |                       | 28.643                      |
| Notes_Titles                                                                                                                                                        |                               |                               |                                   |                      |                                |                                |                               |                                   |                              |                             |                             |                               |                       |                             |
| Robust ci in parentheses (Figures in brackets show 95 percent confidence intervals).                                                                                |                               |                               |                                   |                      |                                |                                |                               |                                   |                              |                             |                             |                               |                       |                             |
| *** p<0.01, ** p<0.05 (to facilitate readability-only significant results have been presented; please refer to appendix x for the complete results of the analyses) |                               |                               |                                   |                      |                                |                                |                               |                                   |                              |                             |                             |                               |                       |                             |
